# Supplementary material for: TGF-β loaded exosome enhances ischemic wound healing in vitro and in vivo
Source: Theranostics. 2021 Apr 30;11(13):6616–31. doi: 10.7150/thno.57701 (PMC8120220; doi:10.7150/thno.57701)
Supplement: Supplementary file 1 — Supplementary figures and tables. [file thnov11p6616s1.pdf]

**Supplementary materials**

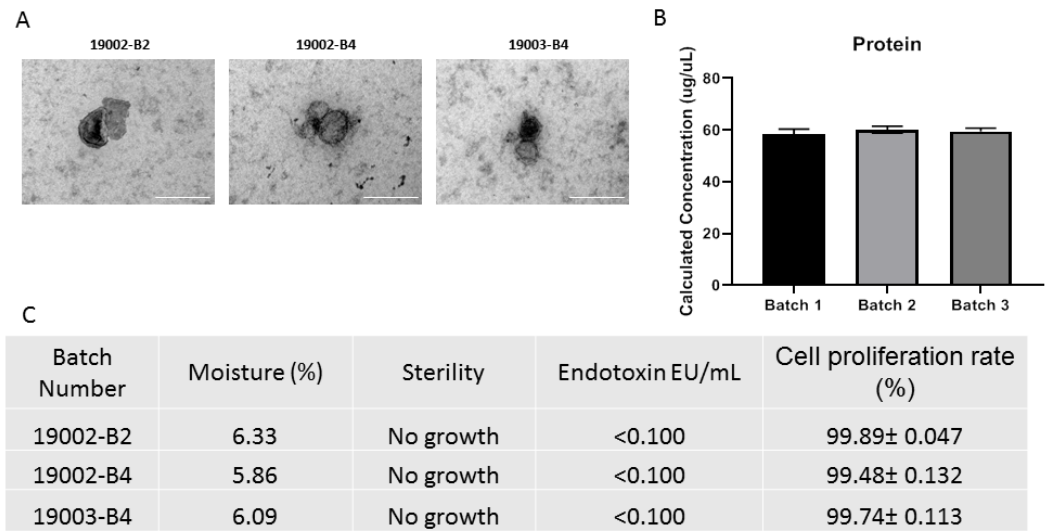

**Figure S1.** PEP batches have consistent features. (A): Representative transmission electron microscopic image of PEP exosomes from each batch. Scale bar, 200 nm. (B): Protein Concentration from different batches. (C): Stability test data from different batches.

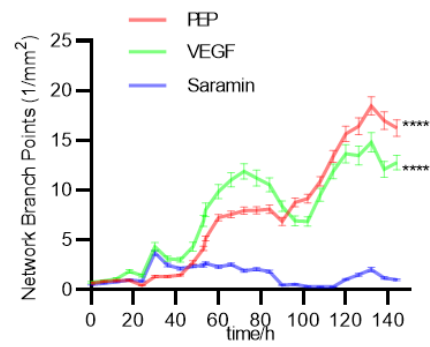

**Figure S2.** PEP promoted HUVECs angiogenesis in vitro. Quantification of branch points was performed every 6 hours over a 6 day period. \*\*\*\*p < 0.0001.

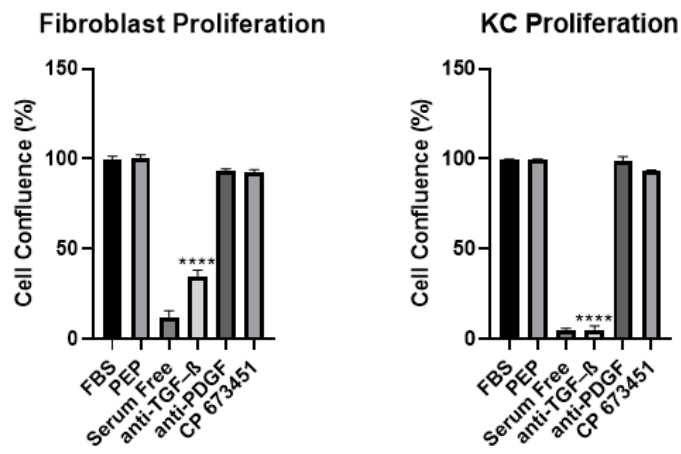

**Figure S3.** PEP promoted fibroblast and keratinocyte proliferation in vitro through exosomal TGF- $\beta$ . Quantification of cell confluence was performed. \*\*\*\* $p < 0.0001$ .

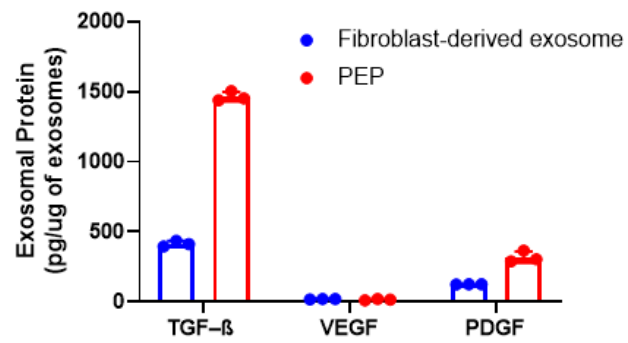

**Figure S4.** Growth factor evaluation of PEP and fibroblast-derived exosomes.

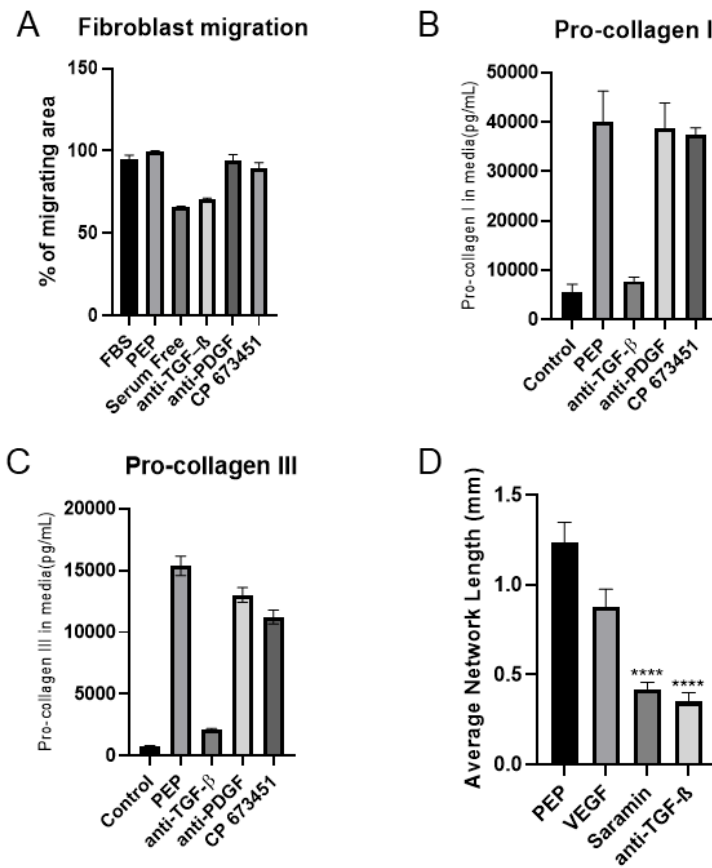

**Figure S5.** Exosomal TGF- $\beta$  inhibition suppressed PEP induced cellular events, including cell migration(A), collagen synthesis (B,C), and vascular tube formation (D).

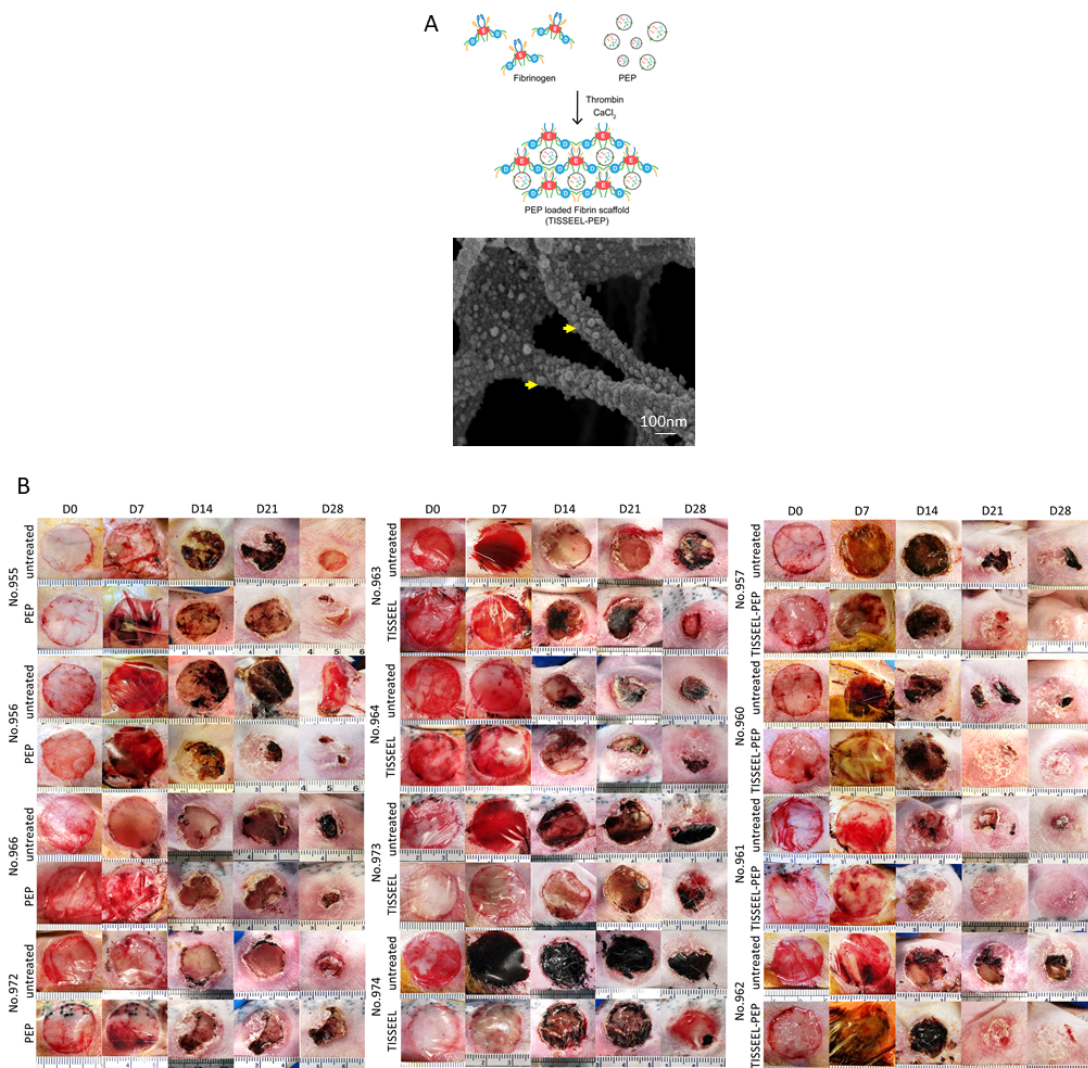

**Figure S6.** TISSEEL-PEP biogel drives in vivo wound healing (A): Schematic of TISSEEL-PEP preparation and representative scanning electron microscopic image of PEP incorporated biogel. Yellow arrow: PEP. (B): Gross picture of each individual animal group up to a 28-day follow-up. Of note, in animals with PEP exposure, contralateral ears were noted to heal better versus those without any PEP exposure (Untreated/TISSEEL grp)

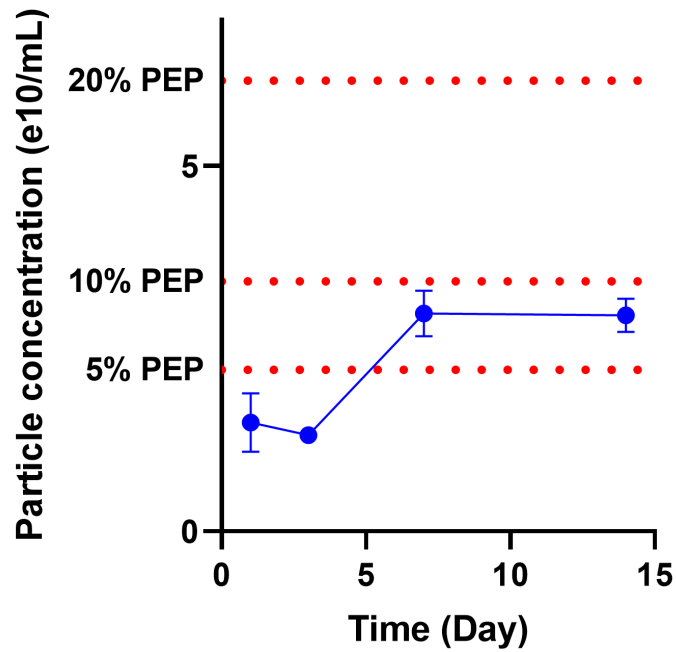

**Figure S7.** TISSEEL-PEP(20%) release assessment. The PEP release profile of TISSEEL-PEP biogel was tested on day 1, 3, 7 and 14 with exosome release normalized to 5%, 10% and 20% PEP standards (y-axis and dotted lines). PEP concentration in TISSEEL was adjusted to achieve release concentrations equivalent to 5% of PEP in solution.

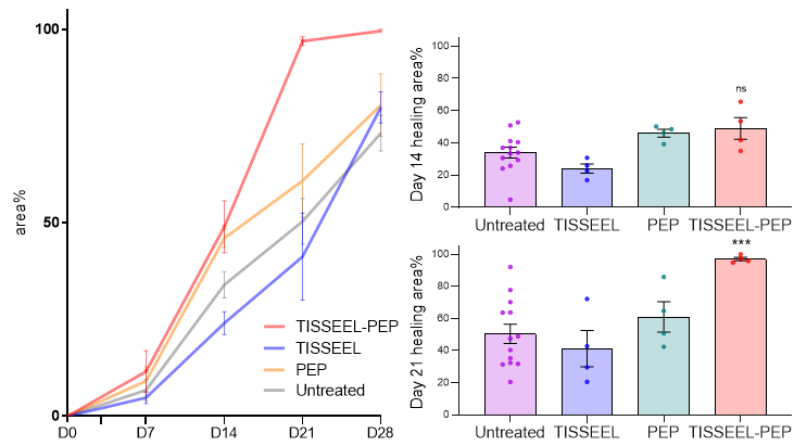

**Figure S8.** Quantification of the healing area up to 28 days of follow-up. 2-tailed unpaired Student's t test for each group compared with untreated control group. \* $p < 0.05$ , \*\* $p < 0.01$ , \*\*\* $p < 0.001$ .

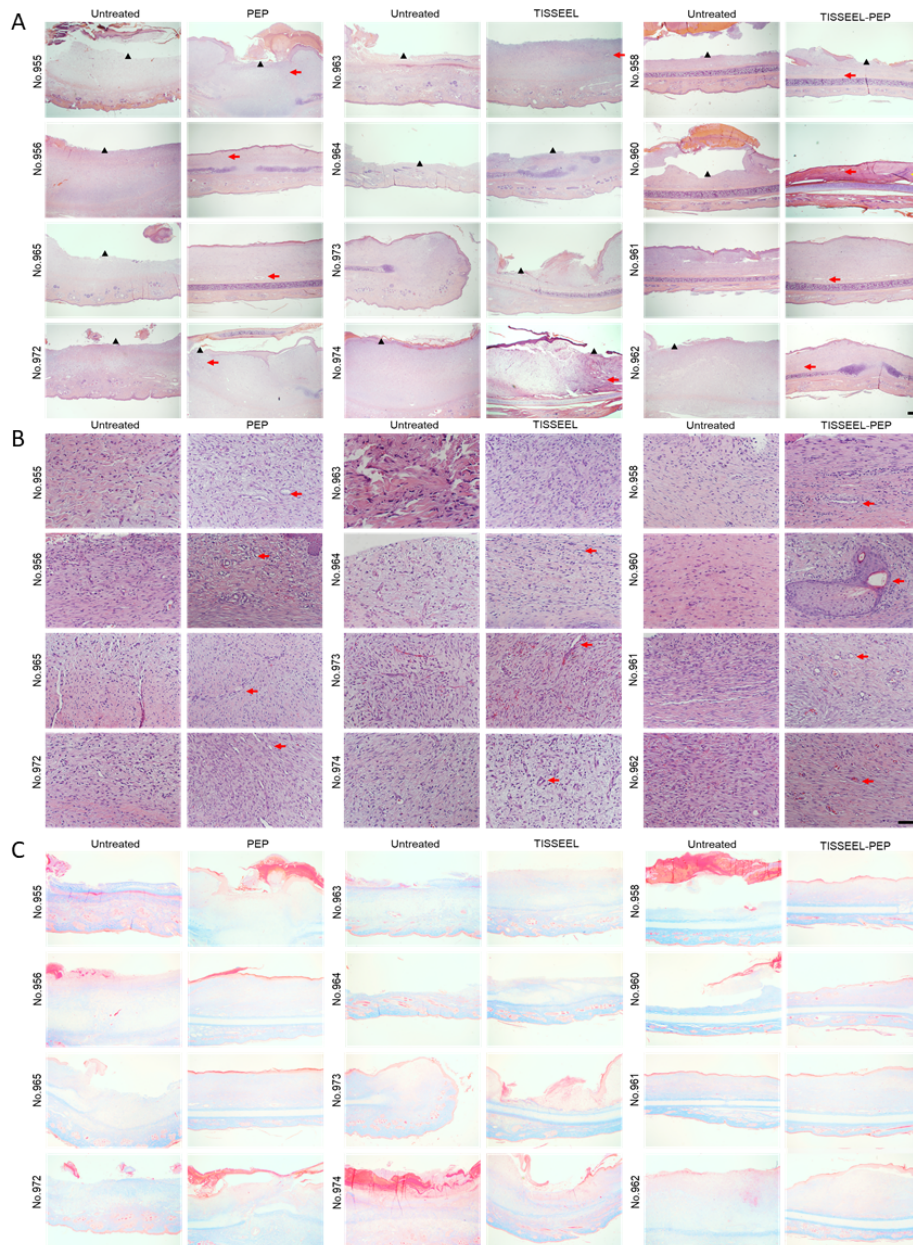

**Figure S9.** Histology assessment of each individual animal. (A): H&E staining of wound bed from each individual animal. Red arrow: new blood vessel. (B): Angiogenesis of wound bed from each individual animal. Red arrow: new blood vessel. (C): Masson trichrome staining of each individual animal. Scale bar in Figure A&C: 100  $\mu$ m. Scale bar in Figure B: 50  $\mu$ m.

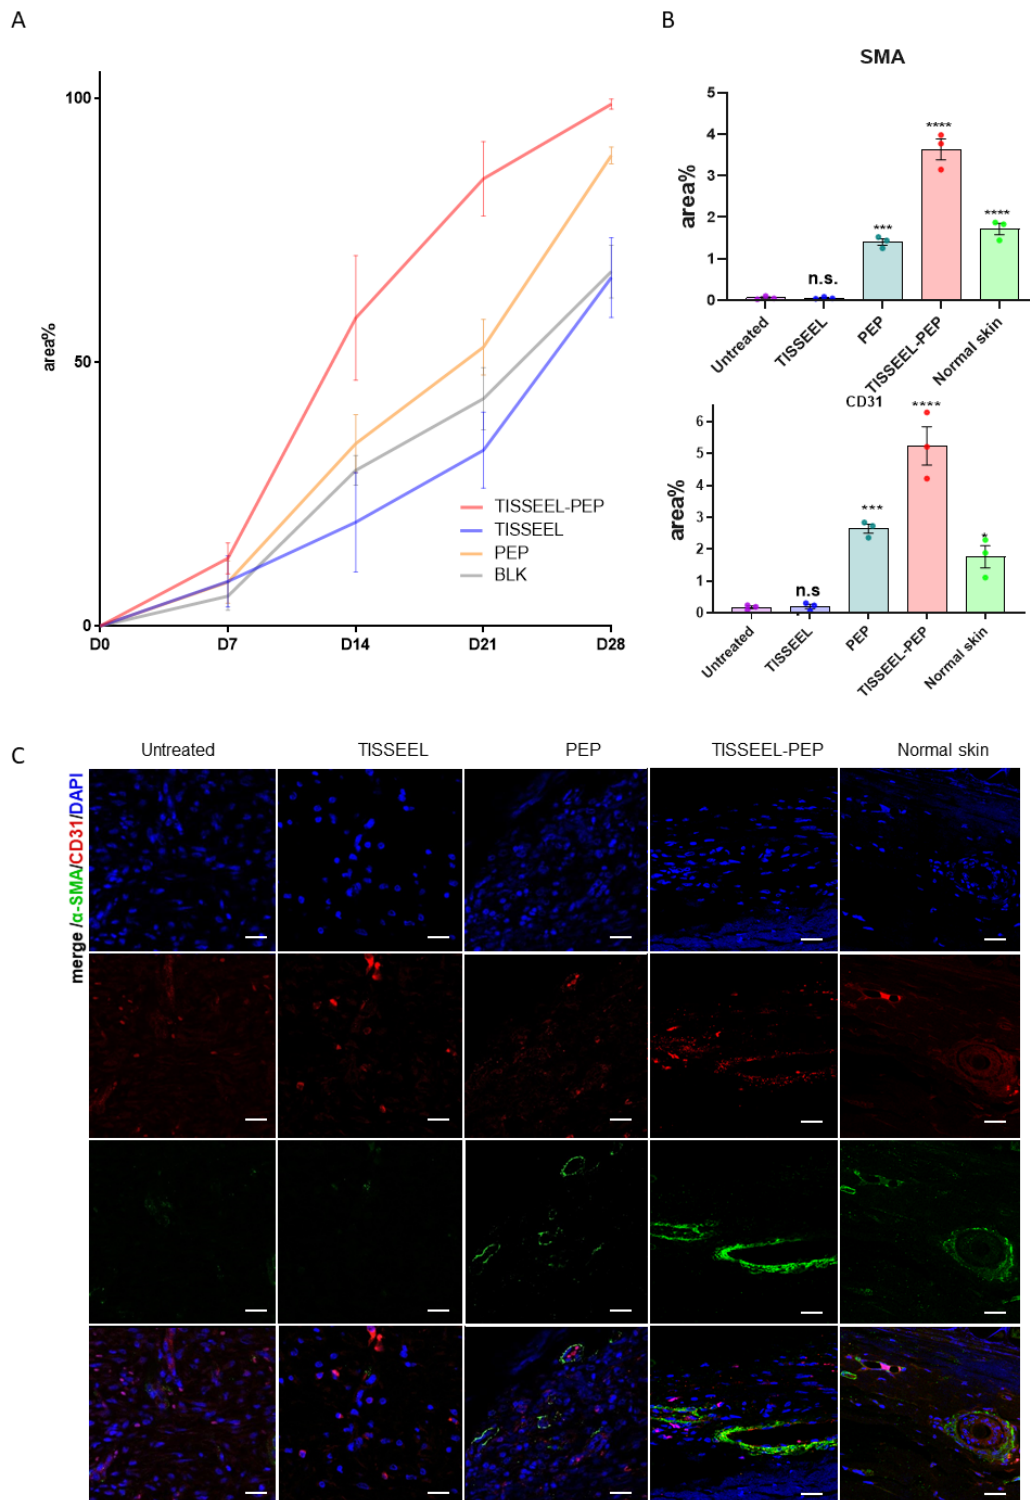

**Figure S10.** Additional in vivo studies. (A): Quantification of the healing area up to 28 days of follow-up. (B&C): CD31 and SMA immunofluorescent staining of wounds from different groups. Scale bar in Figure C: 20  $\mu$ m. \* $p < 0.05$ , \*\*\* $p < 0.001$ , \*\*\*\* $p < 0.0001$ , n.s.= non-significant.

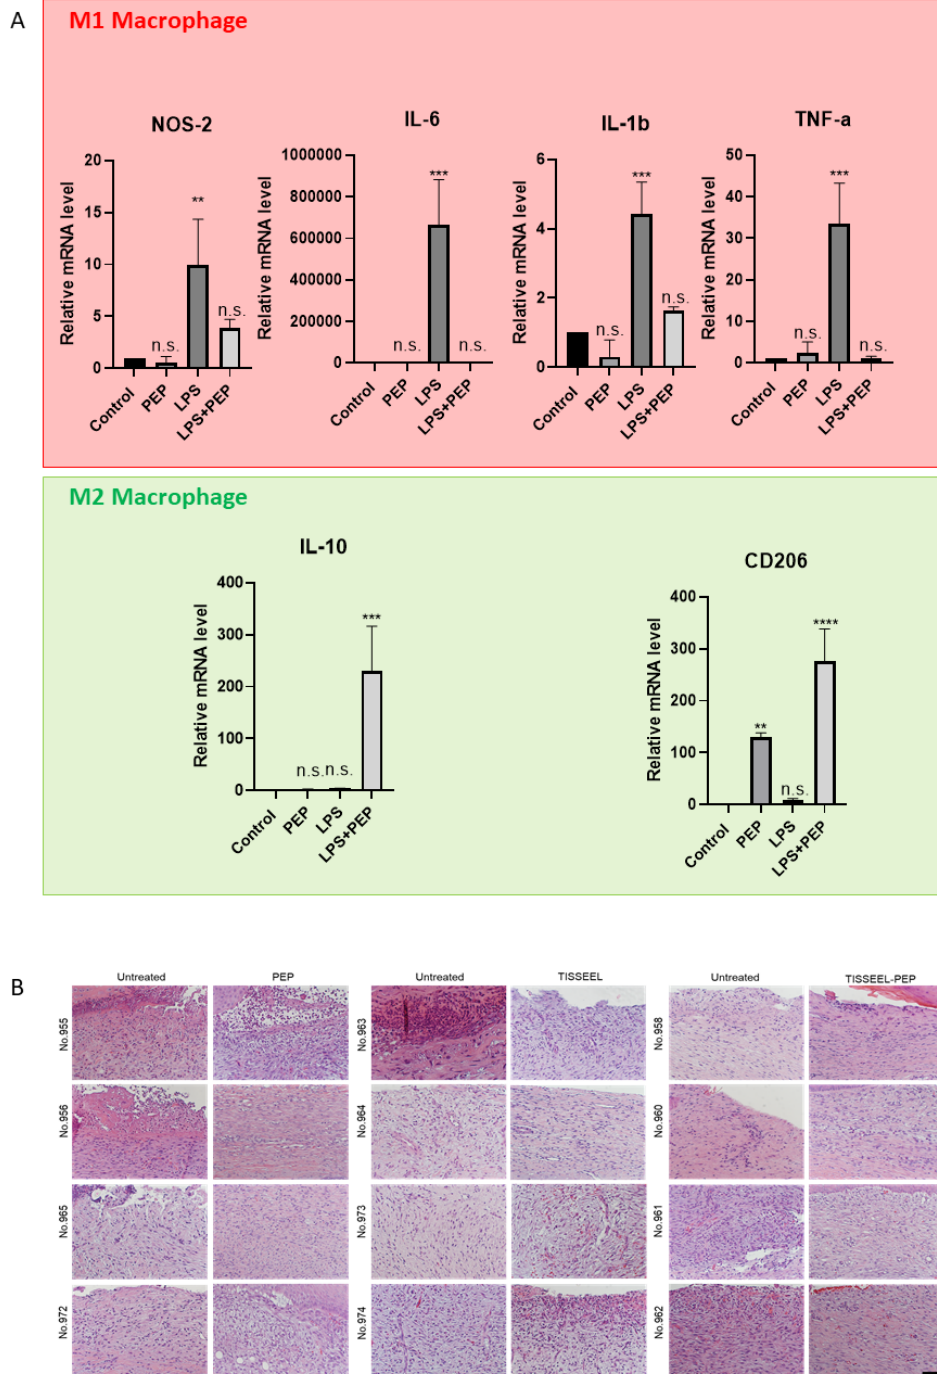

**Figure S11.** PEP stimulated anti-inflammatory response both *in vitro* and *in vivo*. (A): PEP induced macrophage M2 polarization upon LPS stimulation. qRT-PCR analysis of M1(Red) and M2 (Green) signature gene expression displayed as the fold change compared with the normal macrophage control at 24 hours post treatment. (B): Inflammation evaluation of wound bed from each individual animal. Scale bar in Figure B: 50  $\mu$ m. \*\* $p < 0.01$ , \*\*\* $p < 0.001$ , \*\*\*\* $p < 0.0001$ , n.s.= non-significant.

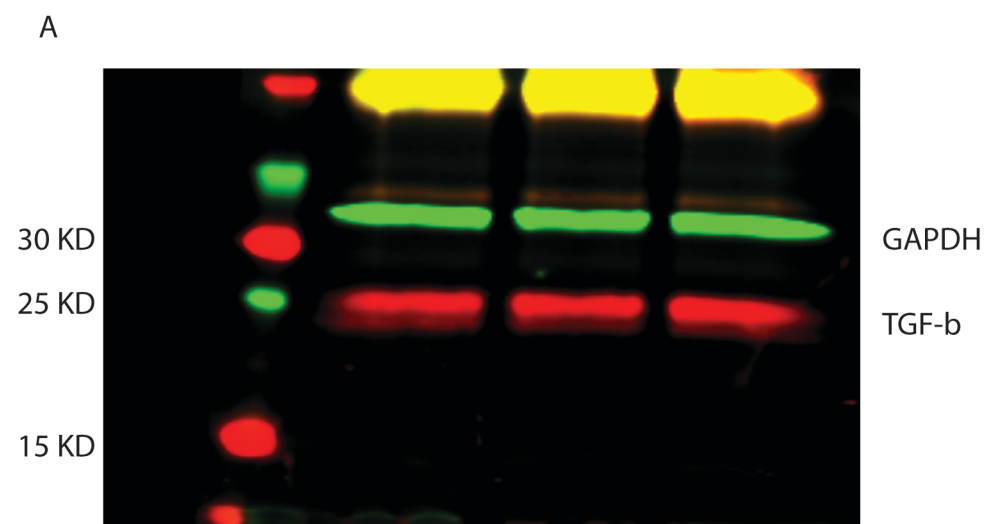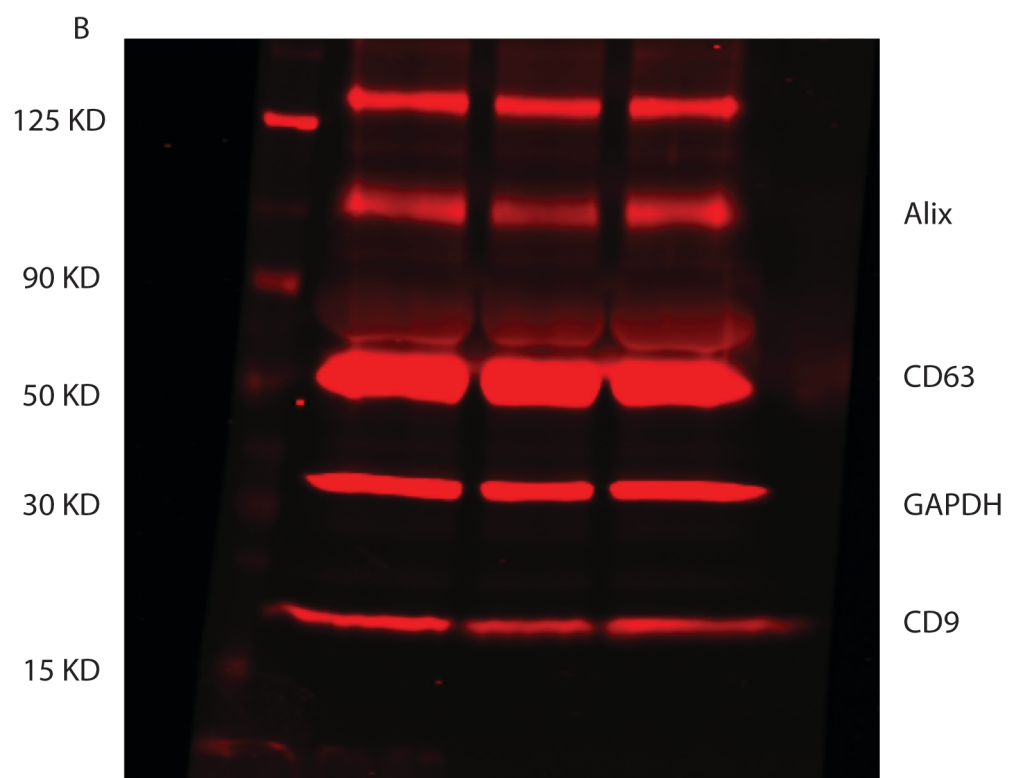

**Figure S11.** Whole blots of western blot analysis.

**Table 1.** PCR primer sequences

|           | Forward                        | Reverse                       |
|-----------|--------------------------------|-------------------------------|
| GAPDH     | GAGTCAACGGATTTGGTCGT           | TTGATTTTGGAGGGATCTCG          |
| H-Ras     | ACGACGATGACAAGA CGGAA          | ATGGCGCTGTACTCCTCCT           |
| Smad2     | ACTAACTTCCCAGCAGGAAT           | GTTGGTCACTTGTTTCTCCA          |
| Erk1      | CCTGCGACCTTAAGATTTGTGATT       | CAGGGAAGATGGGCCGGTTAGAGA      |
| TIMP-1    | TGACATCCGGTTCGTCTACA           | TGCAGTTTTCCAGCAATGAG          |
| Periostin | ATGATTCCCTTTTTACCCATGTTTTCTCTA | GAAGGAATAATCATGCCATTTTTTAAGT  |
| MKK3      | CTTGGTGACCATCTCAGAACTGG        | CTTCTGCTCCTGTGAGTTCACG        |
| P38       | CCAATGCCTACGACAAGACAGC         | TGGGAAGTGACCTCGTTTGCCA        |
| Nf-kb     | GCAGCACTACTTCTTGACCACC         | TCTGCTCCTGAGCATTGACGTC        |
| hRHOA     | CGCTTTTGGGTACATGGAGT           | TTGCAGCAAGGTTTCACAAG          |
| Akt       | TGGACTACCTGCACTCGGAGAA         | GTGCCGCAAAAGGTCTTCATGG        |
| TAK1      | CAGAGCAACTCTGCCACCAGTA         | CATTTGTGGCAGGAACTTGCTCC       |
| NOS2      | GTG GCA GGA CAT GAA GAA GAA    | CAT CAG CAC AGA GGC AAA GA    |
| TNF-a     | CTC ATC TAC TCC CAG GTT CTC T  | GTT GAC CTT GTT CGG GTA GG    |
| IL-6      | GTC AAC TGC ATG AAC AGA AAG G  | AGC AGG CAG GTC TCA TTA TTC   |
| IL-1 b    | CGA ACC CAA GCT ACA GGA ATA G  | TGG AAA GTG TGT GTC CAA TCA   |
| IL-10     | CCT GTG GGA TTT GAG TGT CTT A  | GCT CGG CTT AGG AGT TAG AAA G |
| CD206     | GGT GAC ATC CAC GAC TAC TTT AG | CCA GGC ATA GCT GTT GTA CTT   |

**Table 2.** Full gene list of transcriptome change (Attached)
